# Supplementary material for: Dual single-atom sites coupled with graphene-encapsulated core–shell Fe–Cu nanoalloy for boosting the oxygen reduction reaction
Source: Royal Society of Chemistry journal article supplement (doi:10.1039/d4ta05015k), 2024-01-01
Supplement: d4ta05015k1.pdf [file d4ta05015k1.pdf]

## Supplementary Information

### Dual Single-Atom Sites Coupled with Graphene-Encapsulated Core-Shell Fe-Cu Nanoalloy for Boosting Oxygen Reduction Reaction

Katam Srinivas<sup>a1</sup>, Zhuo Chen<sup>b,1</sup>, Anran Chen<sup>c</sup>, He Huang<sup>a</sup>, Chengtao Yang<sup>a</sup>, Fei Wang<sup>d,e\*</sup>, Ming-qiang Zhu<sup>b\*</sup>, and Yuanfu Chen<sup>a\*</sup>

<sup>a</sup> School Yangtze Delta Region Institute (Huzhou), and School of Integrated Circuit Science and Engineering, University of Electronic Science and Technology of China, 313001 Huzhou, Zhejiang, PR China

<sup>b</sup> College of Mechanical and Electronic Engineering, Northwest A&F University, Yangling, 712100, PR China

<sup>c</sup> School of Materials and Energy, Yunnan University, Kunming 650091, PR China

<sup>d</sup> Faculty of Materials Science and Engineering, Kunming University of Science and Technology, Kunming 650093, PR China

<sup>e</sup> College of Materials Science and Engineering, Sichuan University, Chengdu 610065, PR China

\* Corresponding authors.

*E-mail addresses:* echo1994wf@foxmail.com (F. Wang), zmqsx@nwsuaf.edu.cn (M.-q. Zhu), yfchen@uestc.edu.cn (Y. Chen).

<sup>1</sup> These authors contributed equally to this work.

## 1. Experimental Section

Absolute ethanol and the distilled water were used in washing the materials throughout the investigations.

### 1.1 Structural characterizations

Scanning electron microscope (SEM) images were carried out on a ZEISS Gemini 300. Transmission electron microscopy (TEM), high-resolution TEM (HR-TEM), high angle annular dark field scanning transmission electron microscopy (HAADF-STEM), and element mapping analysis images were examined on a Talos F200X G2 with superX spectroscopy equipment. Aberration-corrected HAADF-STEM (AC-HAADF-STEM) images were carried out on FEI-Themis Z. X-ray diffraction (XRD) data were tested on a Rigaku Smartlab. Raman spectra data were measured on a Renishaw confocal microscope. X-ray photoelectron spectroscopy (XPS) data were obtained on a Thermo Scientific K-Alpha. N<sub>2</sub> adsorption/desorption isotherms (NADI) were obtained on a Micromeritics ASAP 2460 at 77 K. Inductively coupled plasma optical emission spectroscopy (ICP-OES) results were gained on a PE Avio 200.

### 1.2 Electrochemical characterizations

Electrochemical **ORR** measurements were carried out in O<sub>2</sub>- and N<sub>2</sub>-saturated 0.1 M KOH by using an electrochemical workstation (Pine, WaveDriver20) equipped with three electrodes. Wherein the catalyst-loaded rotating disc electrode (RDE, Pine, 5 mm; for CV, LSV, CSCA, CV cycling, *i-t*, and methanol poisoning) and a rotating-ring disc electrode (RRDE, Pine, N = 0.37; for electron transfer number and H<sub>2</sub>O<sub>2</sub> yield) were used as working

electrodes, while the Hg/HgO electrode and Pt wire were used as the reference and counter electrodes, respectively.

Working electrodes were prepared by sonicating 5 mg of catalyst powder in 1 mL of mixed solvents ( $V_{\text{water}} : V_{\text{ethanol}} = 3: 1$ ) for 5 minutes. To which, 50  $\mu\text{L}$  of Nafion ink was injected and ultrasonicated for an additional 30 min. Afterwards, 15  $\mu\text{L}$  of catalyst ink was loaded on RDE and RRDE. The loading amounts of all the catalysts, including 20 wt.% Pt/C for ORR, were 0.29  $\text{mg cm}^{-2}$ . All measured potentials were corrected versus the reversible hydrogen electrode (RHE) using the Nernst equation ( $E_{\text{RHE}} = E_{(\text{Hg}/\text{HgO})} + 0.0591 \times \text{pH} + 0.098$ ). The cyclic voltammetry (CV) curves were detected from 0.2 to 1.0 V on RDE (50  $\text{mV s}^{-1}$ ). The linear sweep voltammetry (LSV) curves were investigated from 0.2 to 1.1 V (10  $\text{mV s}^{-1}$ , 400-2500 rpm). Cyclic step chronoamperometry (CSCA) was conducted to measure the solution resistance by adding an instantaneous 50 mV step potential at 8 ms. The final LSV data was obtained by subtracting the background current measured in  $\text{N}_2$ -saturated electrolyte and performing  $iR$  compensation using the CSCA results. The CV cycling tests were carried out from 0.6 to 1.0 V for continuous 3,000 cycles (200  $\text{mV s}^{-1}$ ). The long-term durability experiments were executed by a chronoamperometry test on RDE at 0.6 V for 27,000 s (at 1600 rpm). Methanol tolerance tests were carried out by adding 20 mL of methanol to 80 mL of 0.1 M KOH electrolyte.

The Koutecky–Levich equation was provided to evaluate the values of electron transfer number ( $n$ ).

$$\frac{1}{j} = \frac{1}{j_d} + \frac{1}{j_k} = \frac{1}{B\omega^{1/2}} + \frac{1}{j_k}$$

$$B = 0.2nFC_0D^{2/3}V^{-1/6}$$

Wherein,  $j$ : measured current density;  $j_k$ : kinetic current density;  $j_d$ : diffusion-limited current density;  $\omega$ : the angular velocity of the disk ( $\text{rad s}^{-1}$ );  $F$ : Faraday constant ( $96485 \text{ C mol}^{-1}$ );  $C_0$ : bulk concentration of  $\text{O}_2$  ( $1.2 \times 10^{-6} \text{ mol cm}^{-3}$ );  $D_0$ : diffusion coefficient of  $\text{O}_2$  in  $0.1 \text{ M KOH}$  ( $1.9 \times 10^{-5} \text{ cm}^2 \text{ s}^{-1}$ );  $V$ : kinematic viscosity of the electrolyte ( $0.01 \text{ cm}^2 \text{ s}^{-1}$ ).

The  $\text{H}_2\text{O}_2$  yield and ‘ $n$ ’ were further detected on RRDE. The LSV was obtained from 1.1 to 0.1 V ( $5 \text{ mV s}^{-1}$ , 1600 rpm). And its ring potential was set at 1.3 V. Used the subsequent equations to calculate their specific values:

$$\text{H}_2\text{O}_2(\%) = 200 \times \frac{\frac{I_r}{N}}{I_d + \frac{I_r}{N}}$$

$$n = 4 \times \frac{I_d}{I_d + \frac{I_r}{N}}$$

Wherein,  $I_r$ : ring current;  $I_d$ : disk current;  $N$ : collection efficiency of the Pt ring ( $N = 0.37$ ).

A rechargeable **Zn-Air battery** was constructed in a 6 M KOH aqueous electrolyte consisting of 0.2 M Zn(Ac)<sub>2</sub> using a CHI 660D electrochemical workstation. Polished zinc sheet was used as a metal anode (thickness of 0.3 mm), and the FeCu-DSAs@CNT-loaded carbon paper was employed as air cathode. Electrocatalyst ink preparation is the same as above, and the obtained homogeneous ink was loaded on carbon paper (1.0 mg cm<sup>-2</sup>), and dried in a 50 °C electric oven before assembling the Zn-air battery. While Pt/C-ink was also prepared in the same method. Electrolyte was replaced by pausing the experiment in order to check the rechargeability of a ZAB during the charge-discharge cycling test. All the electrochemical data of the as-prepared electrocatalysts presented in this article has been tested twice to make sure all the results are reliable and reproducible.

### 1.3 DFT methodology

Density functional theory (DFT) calculations were performed using the CASTEP code in Materials Studio 2020.<sup>1</sup> The generalized gradient approximation (GGA) was used in the scheme of Perdew-Burke-Ernzerhof (PBE) to describe the exchange-correlation functional. The cut-off energy for plane wave was set to 500 eV. The energy criterion was set to 10<sup>-5</sup> eV in iterative solution of the Kohn-Sham equation. All the structures were relaxed until the residual forces on the atoms declined to less than 0.03 eV/Å. To prevent interaction between periodic units in the vertical direction, a vacuum space of 10 Å was employed. A Monkhorst-Pack scheme with a k-points mesh of 4 × 4 × 3 was used.

The change of free energy ( $\Delta G$ ) is related to energy variation from the initial to final states and is described as the following expression:<sup>2,3</sup>

$$\Delta G = \Delta E + \Delta ZPE - T\Delta S$$

Here,  $\Delta E$  presents the adsorption energy relating to materials absorbed on surface.  $\Delta ZPE$ , the differences of zero-point energies, and  $\Delta S$ , the entropy change were both calculated through the vibrational frequencies of adsorbed species. The  $\Delta E$  was determined as follows:

$$\Delta E = E_{slab+ads} - (E_{slab} + E_{ads})$$

where  $E_{slab+ads}$  represent the total energy of the absorbed system,  $E_{slab}$  is the energy of clean surface, and  $E_{ads}$  is the energy of adsorbate.

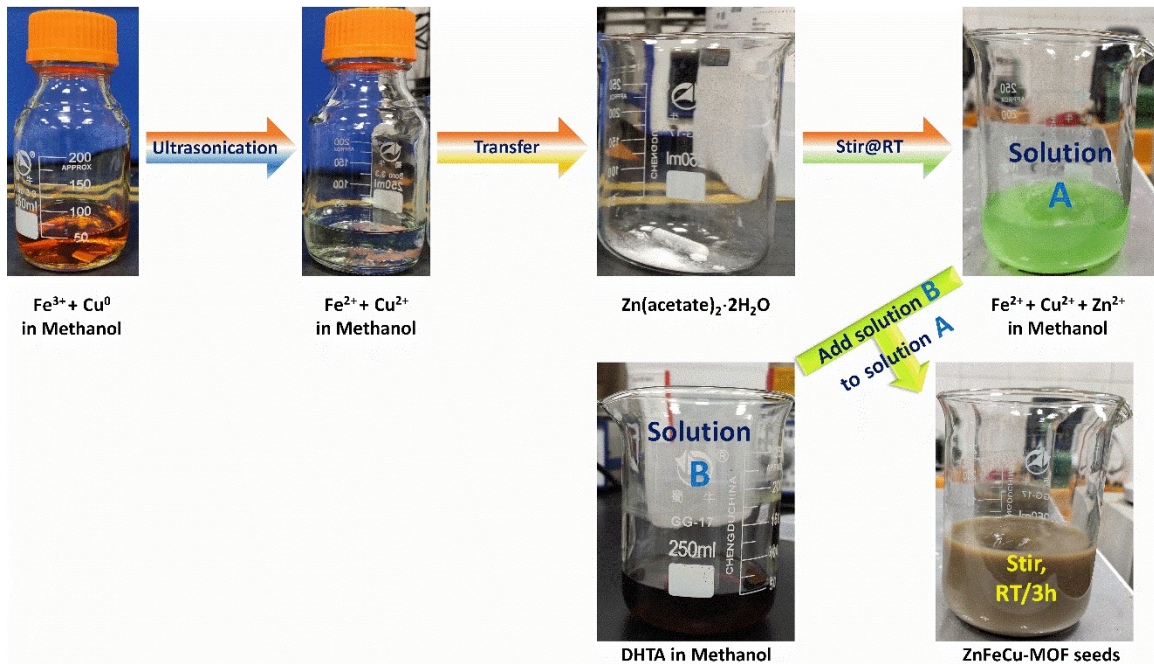

**Fig. S1** Photographic representation of ZnFeCu-MOF-74 synthesis strategy.

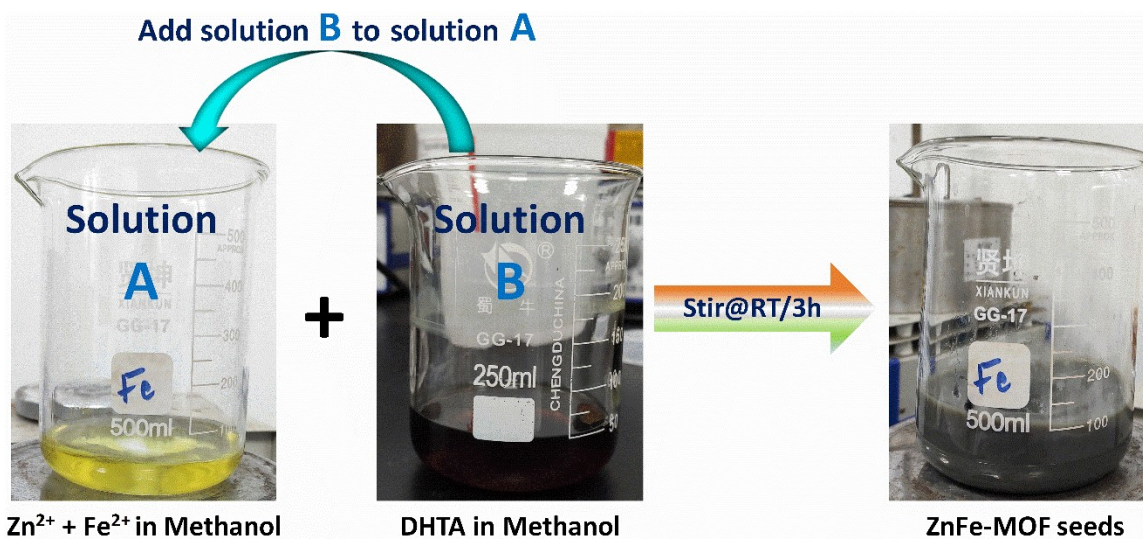

Fig. S2 Photographic representation of ZnFe-MOF-74 synthesis strategy.

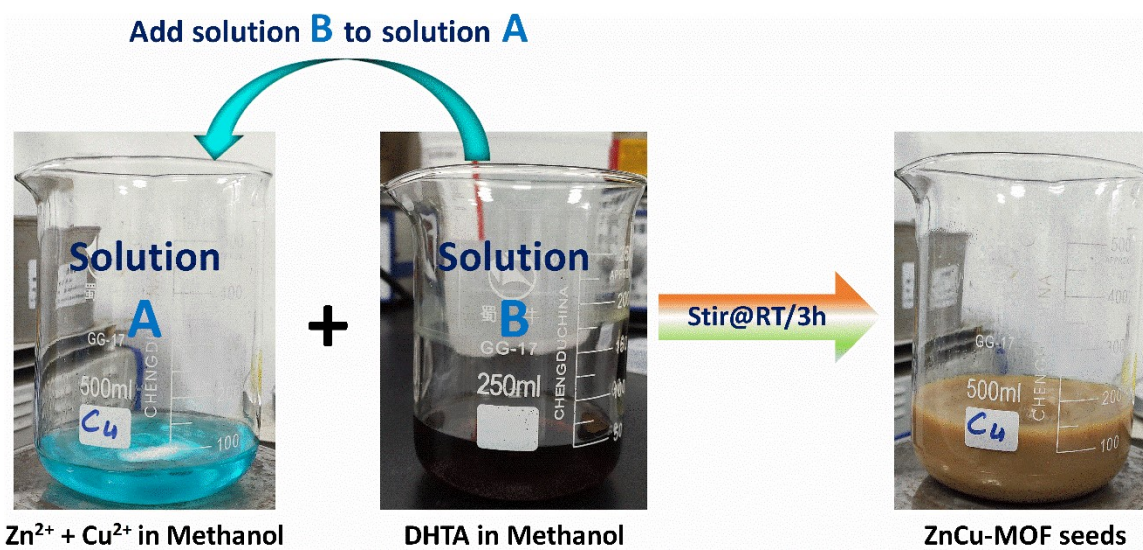

Fig. S3 Photographic representation of ZnCu-MOF-74 synthesis strategy.

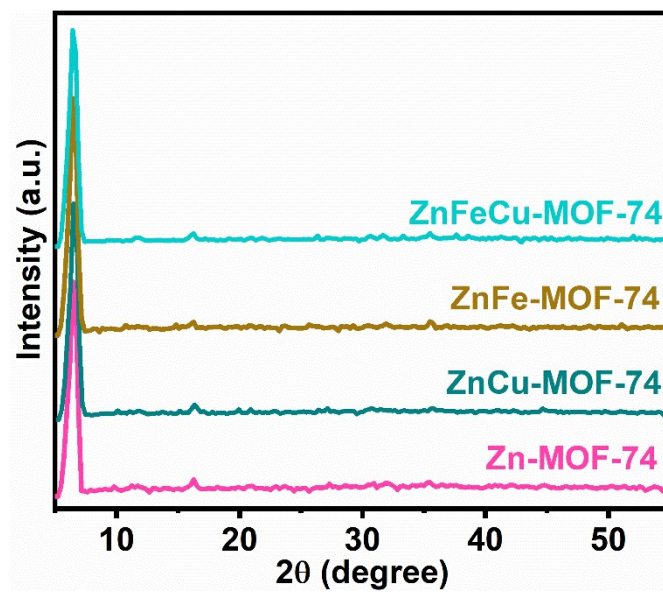

**Fig. S4** Powder XRD patterns of Zn-MOF-74, ZnCu-MOF-74, ZnFe-MOF-74 and ZnCu-MOF-74.



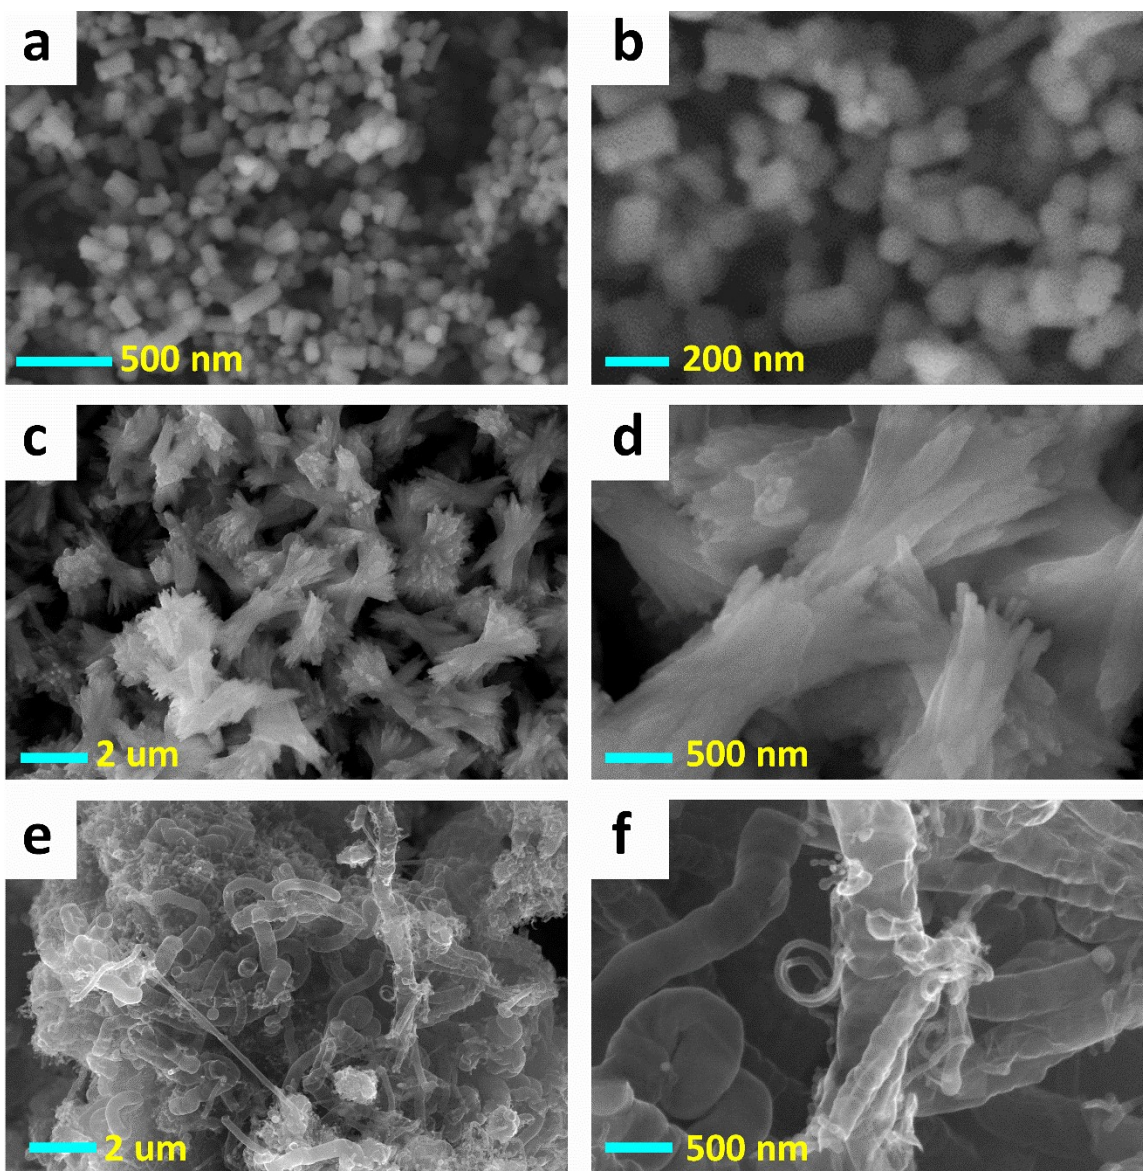

**Fig. S5** SEM images of (a,b) ZnFeCu-MOF-74 seeds, (c,d) ZnFeCu-MOF-74 nanorod bundles, and (e,f) FeCu-DSAs@CNT at different magnifications.

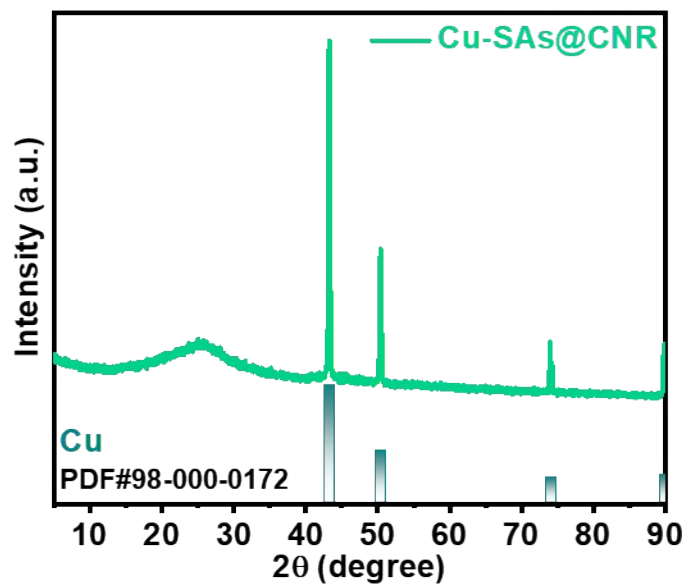

**Fig. S6** Powder XRD patterns of Cu-SAs@CNR.

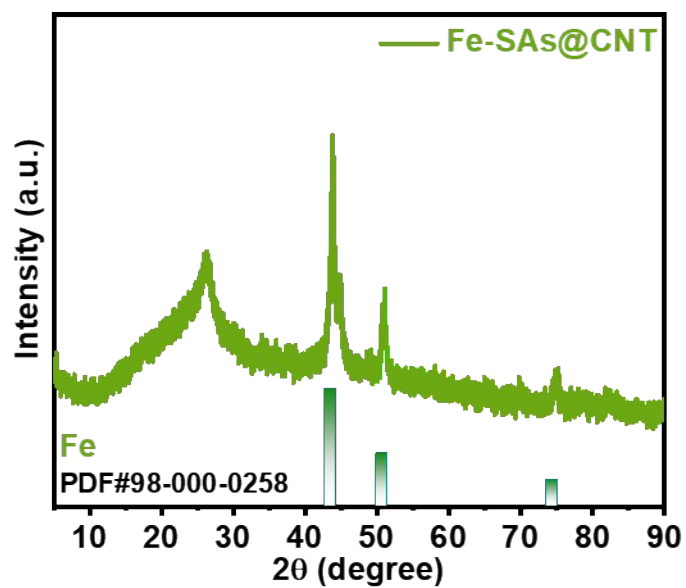

**Fig. S7** Powder XRD patterns of Fe-SAs@CNT.

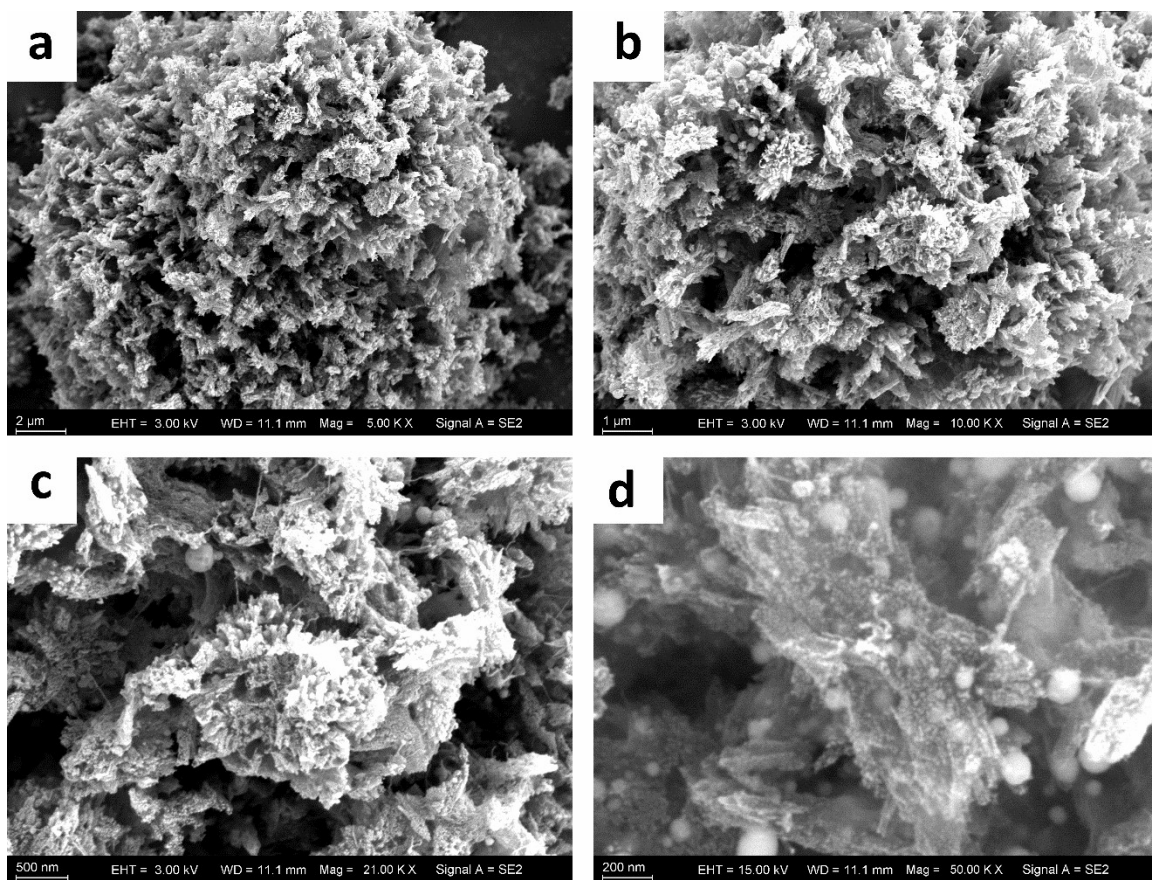

**Fig. S8** (a-d) SEM images of FeCu-NPs@CNR at different magnifications.

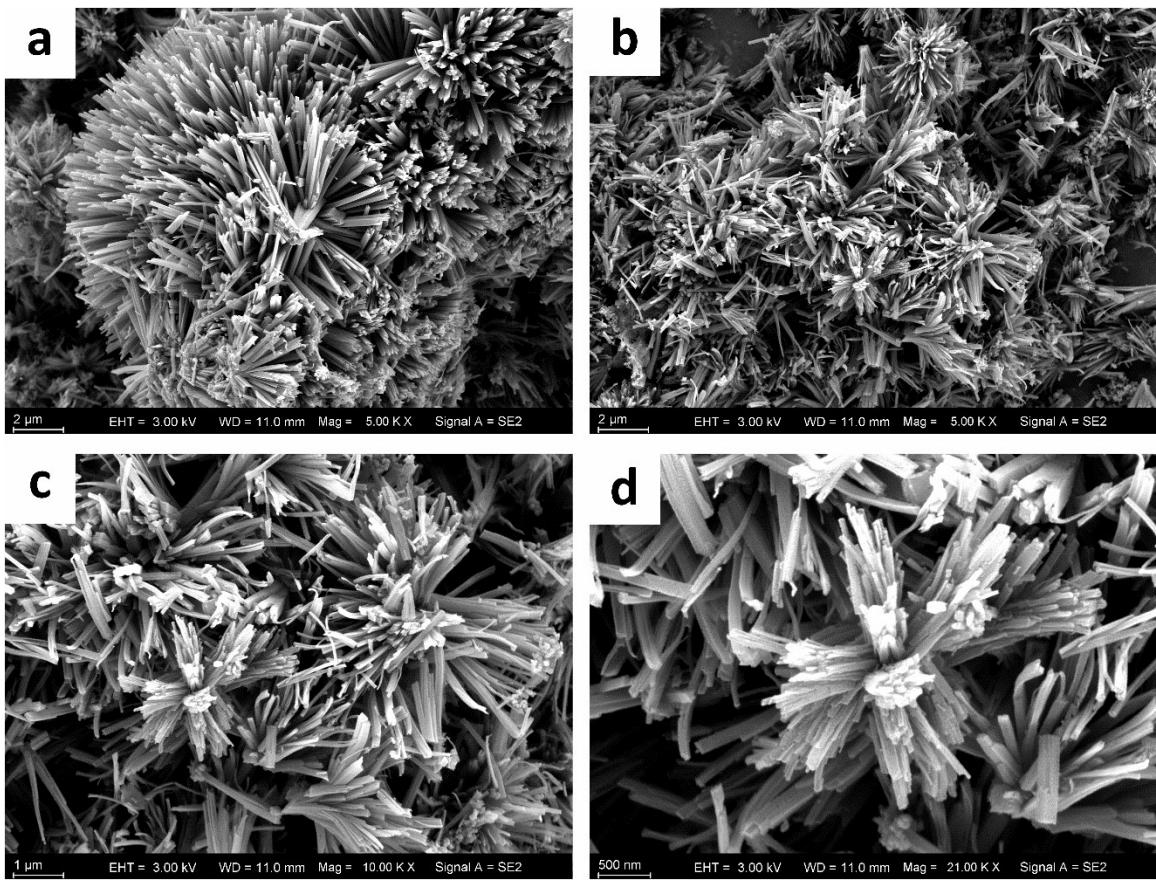

**Fig. S9** (a-d) SEM images of C@900 at different magnifications.

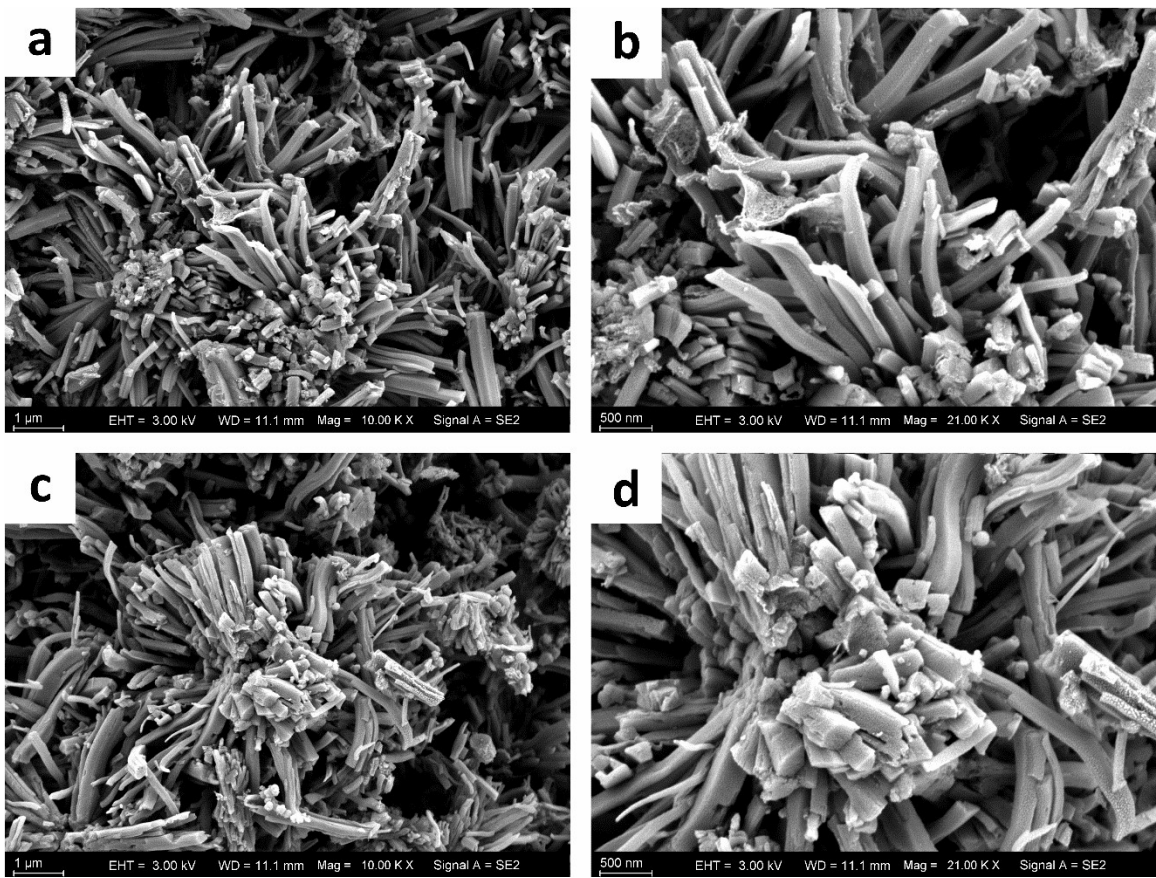

**Fig. S10** (a-d) SEM images of NC@900 at different magnifications.

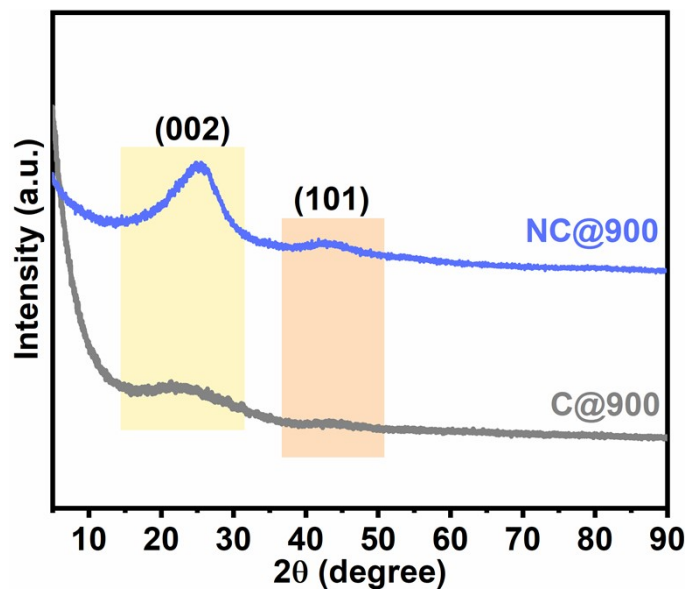

**Fig. S11** Powder XRD patterns of C@900 and NC@900.

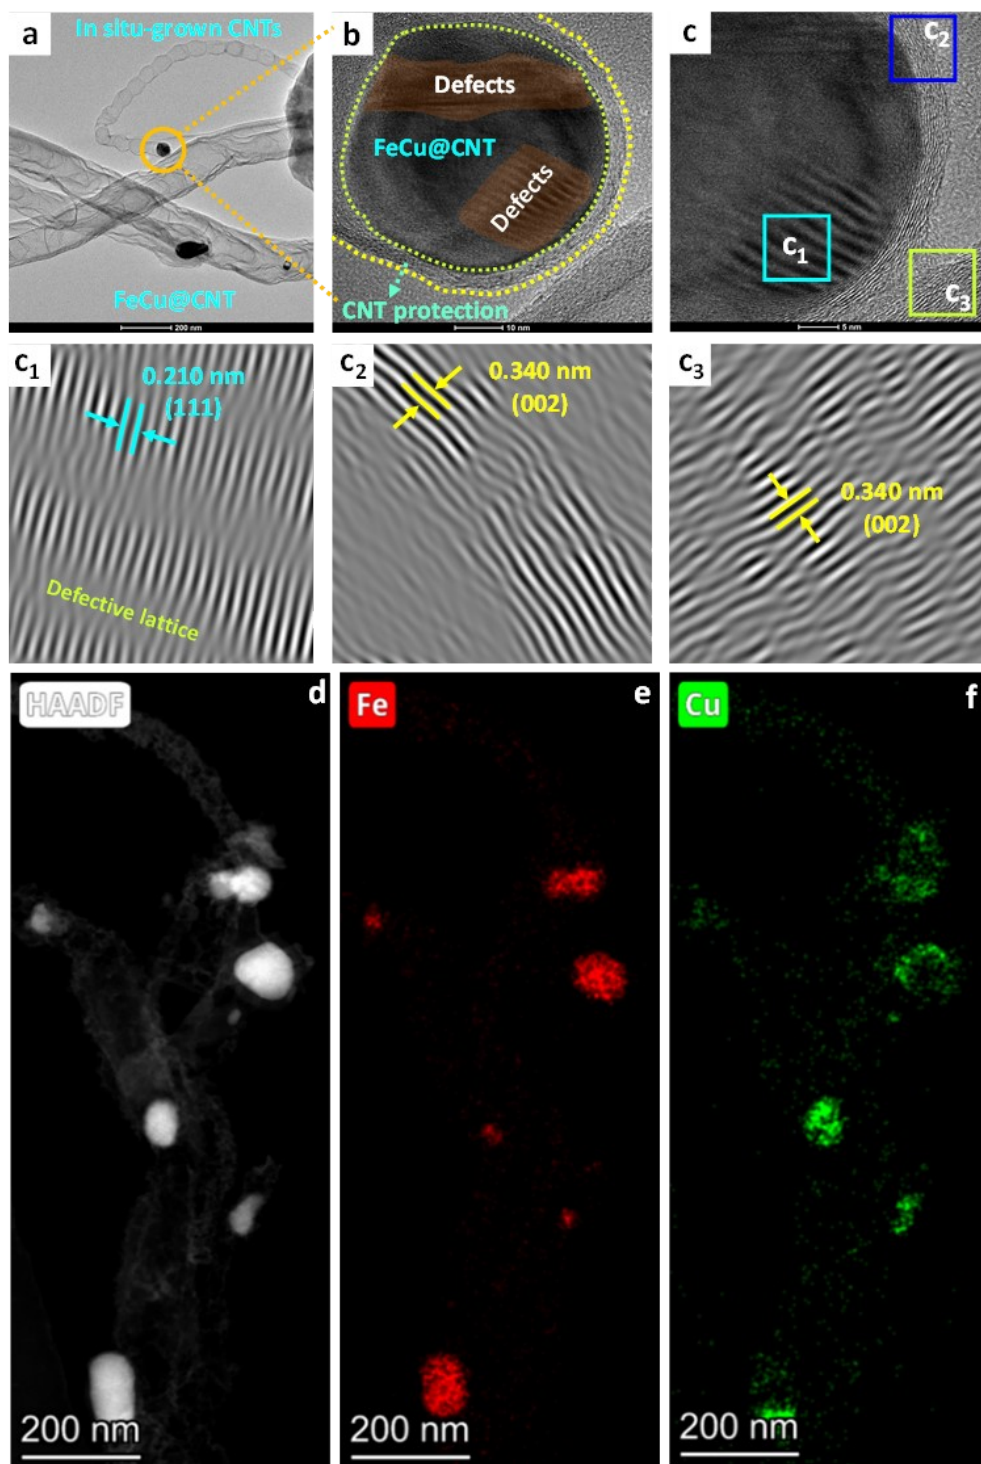

**Fig. S12** (a-c) TEM and HR-TEM images of FeCu-DSAs@CNT, and C<sub>1</sub>-C<sub>3</sub> are the zoomed-in view of different locations in Fig. C, and (d-f) HAADF-STEM and the corresponding EDS-mapping images of Fe and Cu elements.

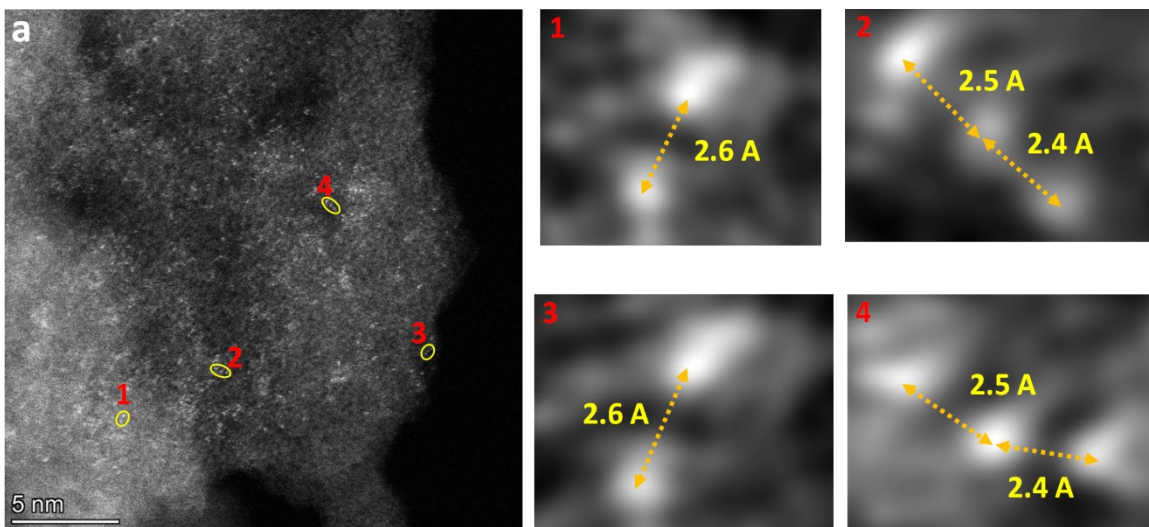

**Fig. S13** AC-HAADF-STEM and the distance between atomically dispersed sites in FeCu-DSAs@CNT.<sup>4-6</sup>



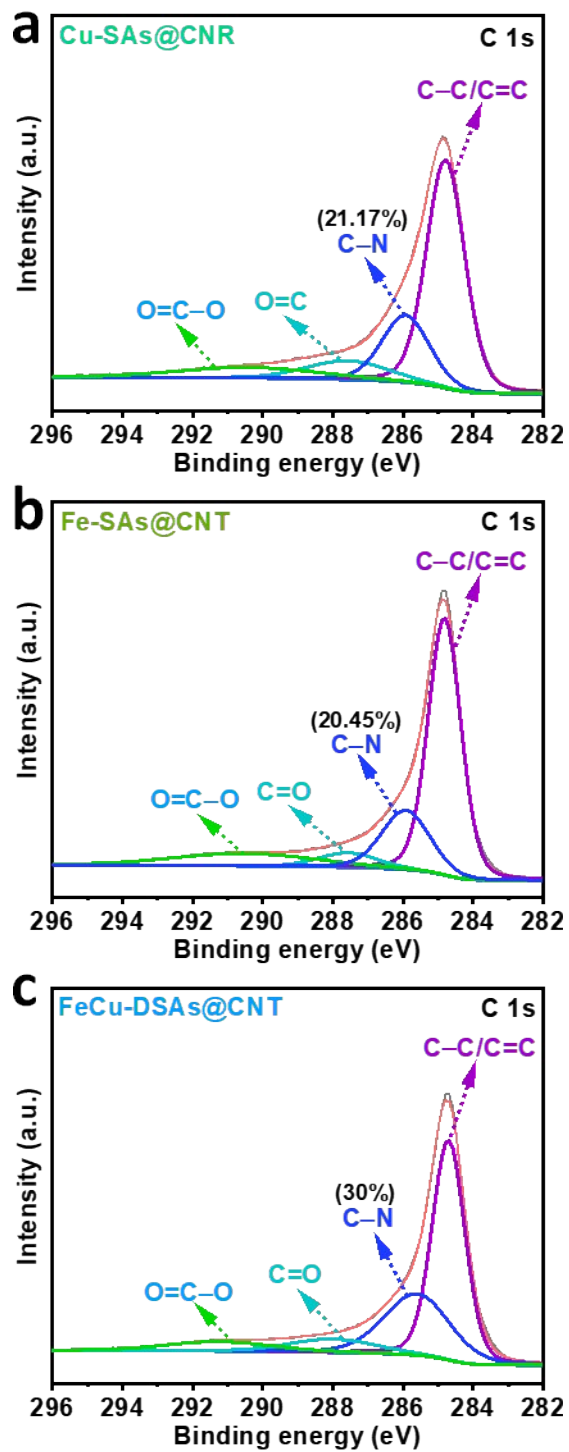

**Fig. S14** (a-c) C 1s XPS spectral data of Cu-SAs@CNR, Fe-SAs@CNT, and FeCu-DSAs@CNT, respectively.

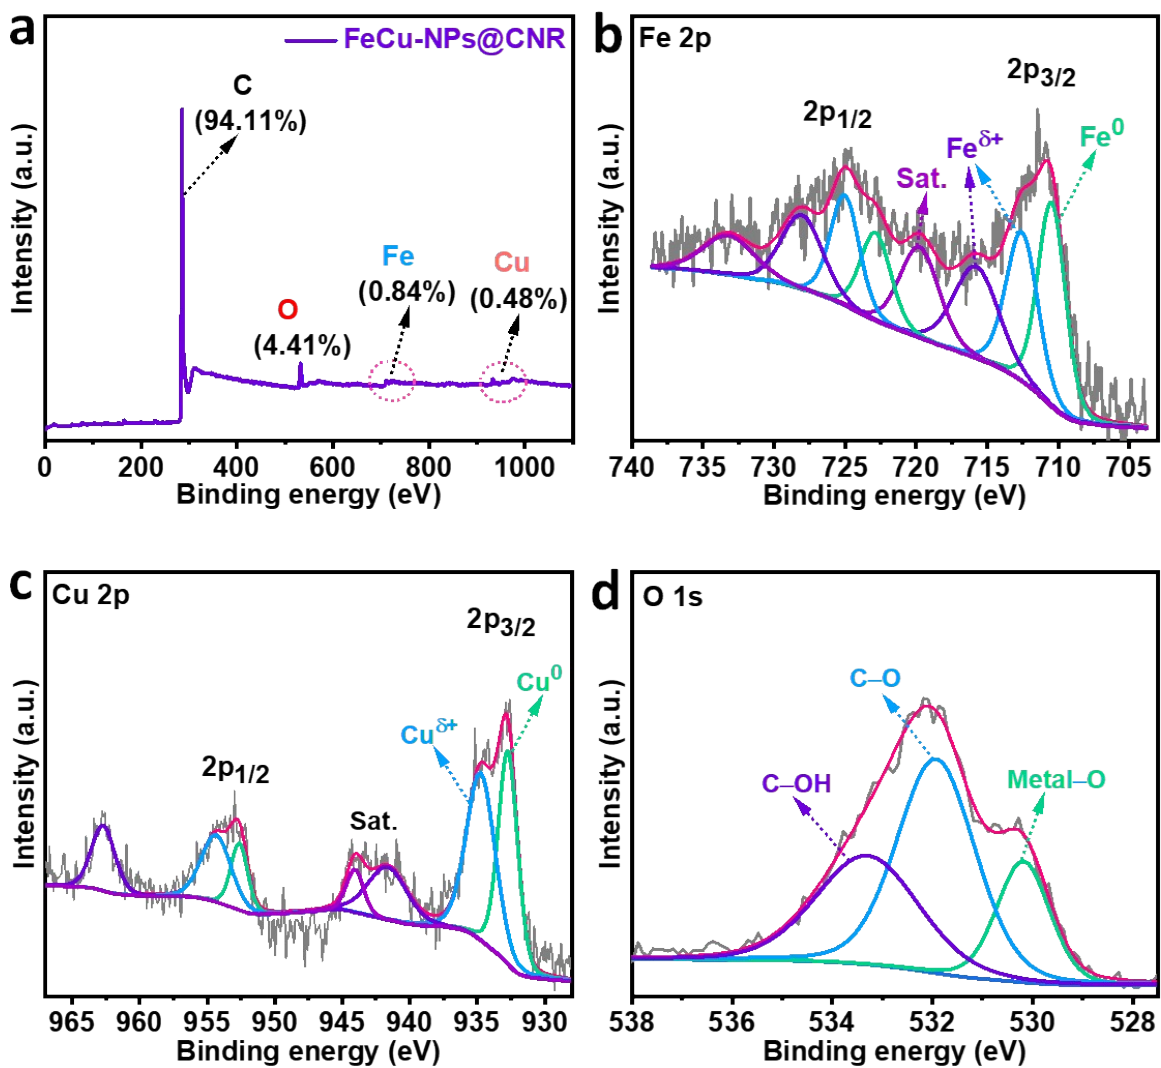

**Fig. S15** (a) XPS survey spectrum, (b) Fe 2p, (c) Cu 2p and (d) O 1s XPS spectral data of FeCu-NPs@CNR, respectively (**Note:** The Fe $\delta^+$  and Cu $\delta^+$  peaks represent the surface oxidized peaks, instead of M-N $_x$  peaks as there was no nitrogen-incorporation).<sup>7</sup>

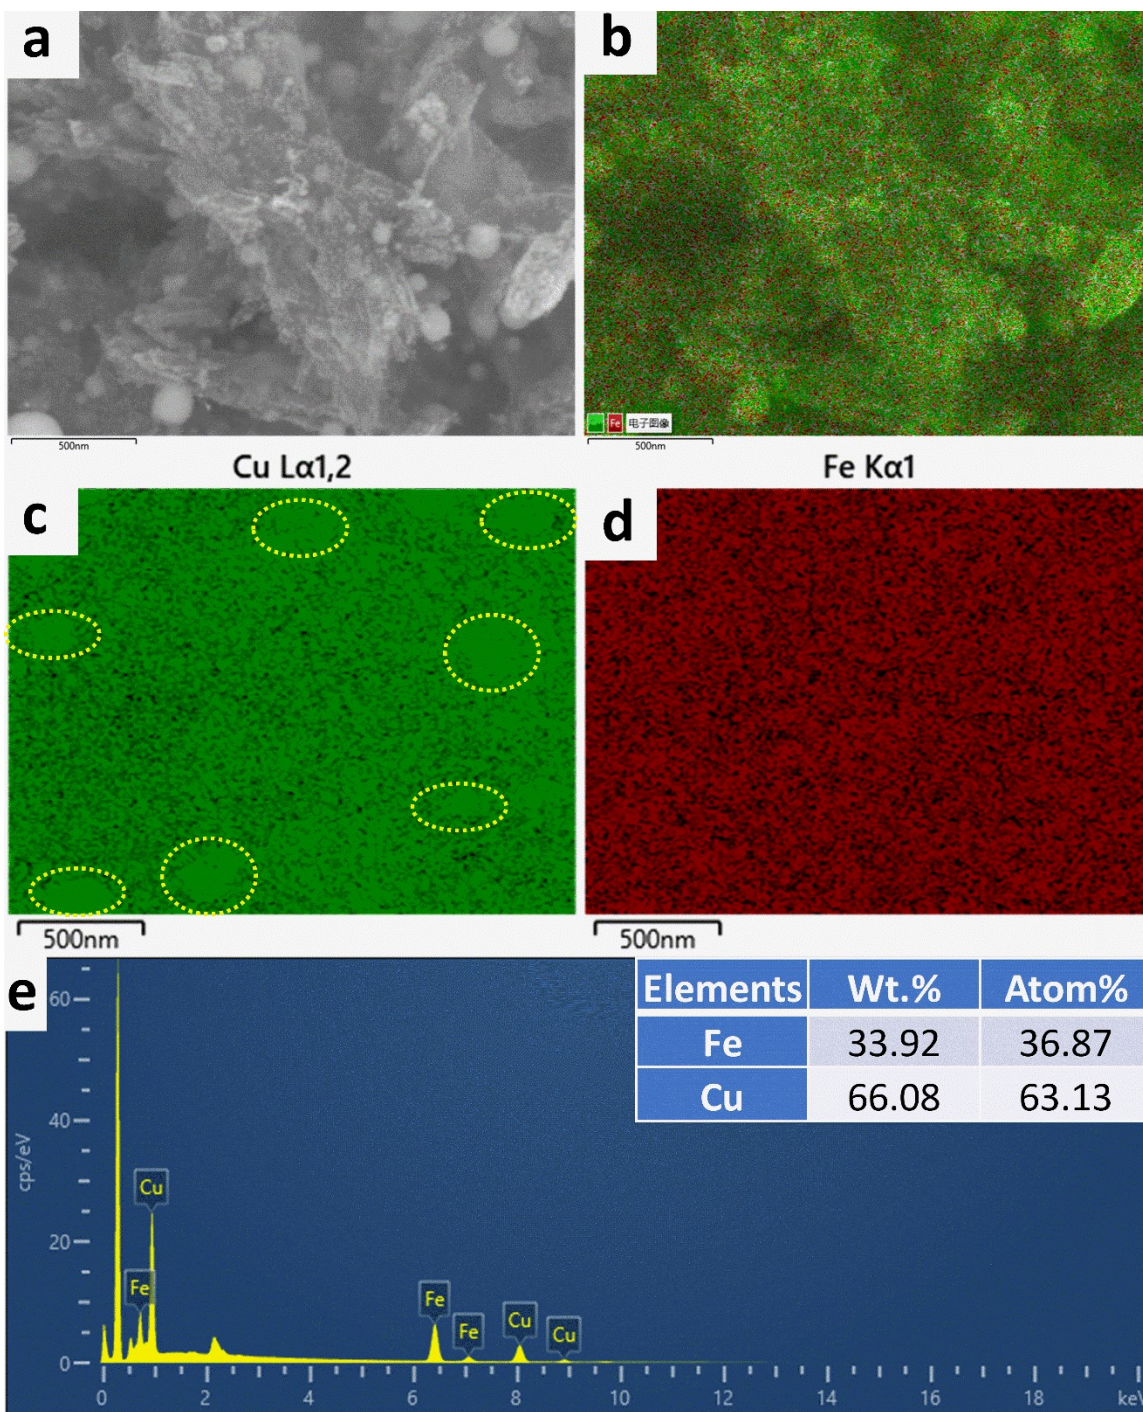

**Fig. S16** (a-e) SEM-based EDS-mapping images and the corresponding elemental content of FeCu-NPs@CNR (inset shows the average elemental content of two tests data).

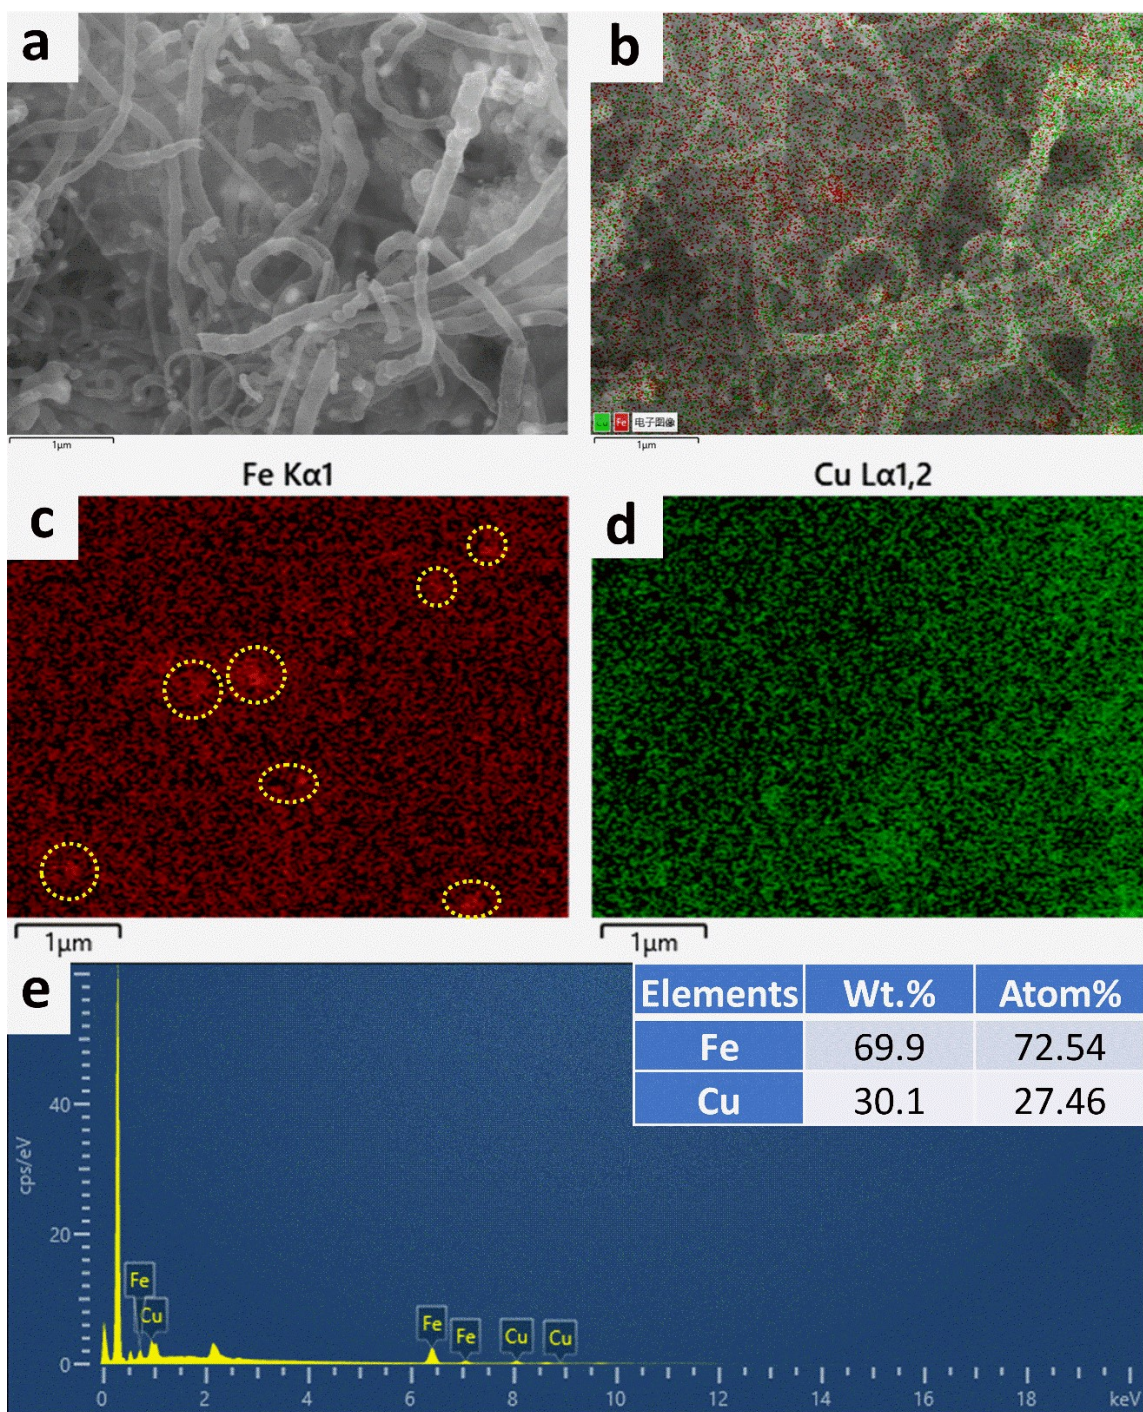

**Fig. S17** (a-e) SEM-based EDS-mapping images and the corresponding elemental content of FeCu-DSAs@CNT (inset shows the average elemental content of two tests data).

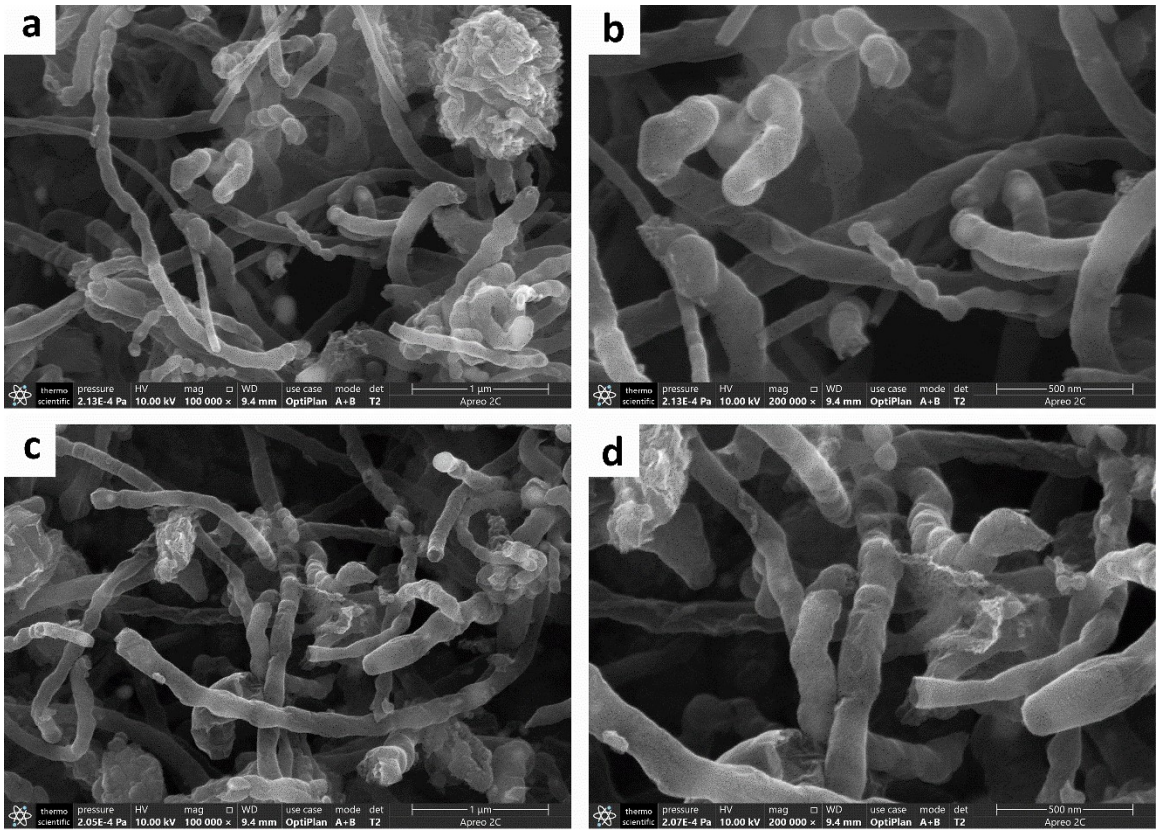

**Fig. S18** (a-d) SEM images of FeCu-DSAs@CNT-AW at different locations and magnifications.

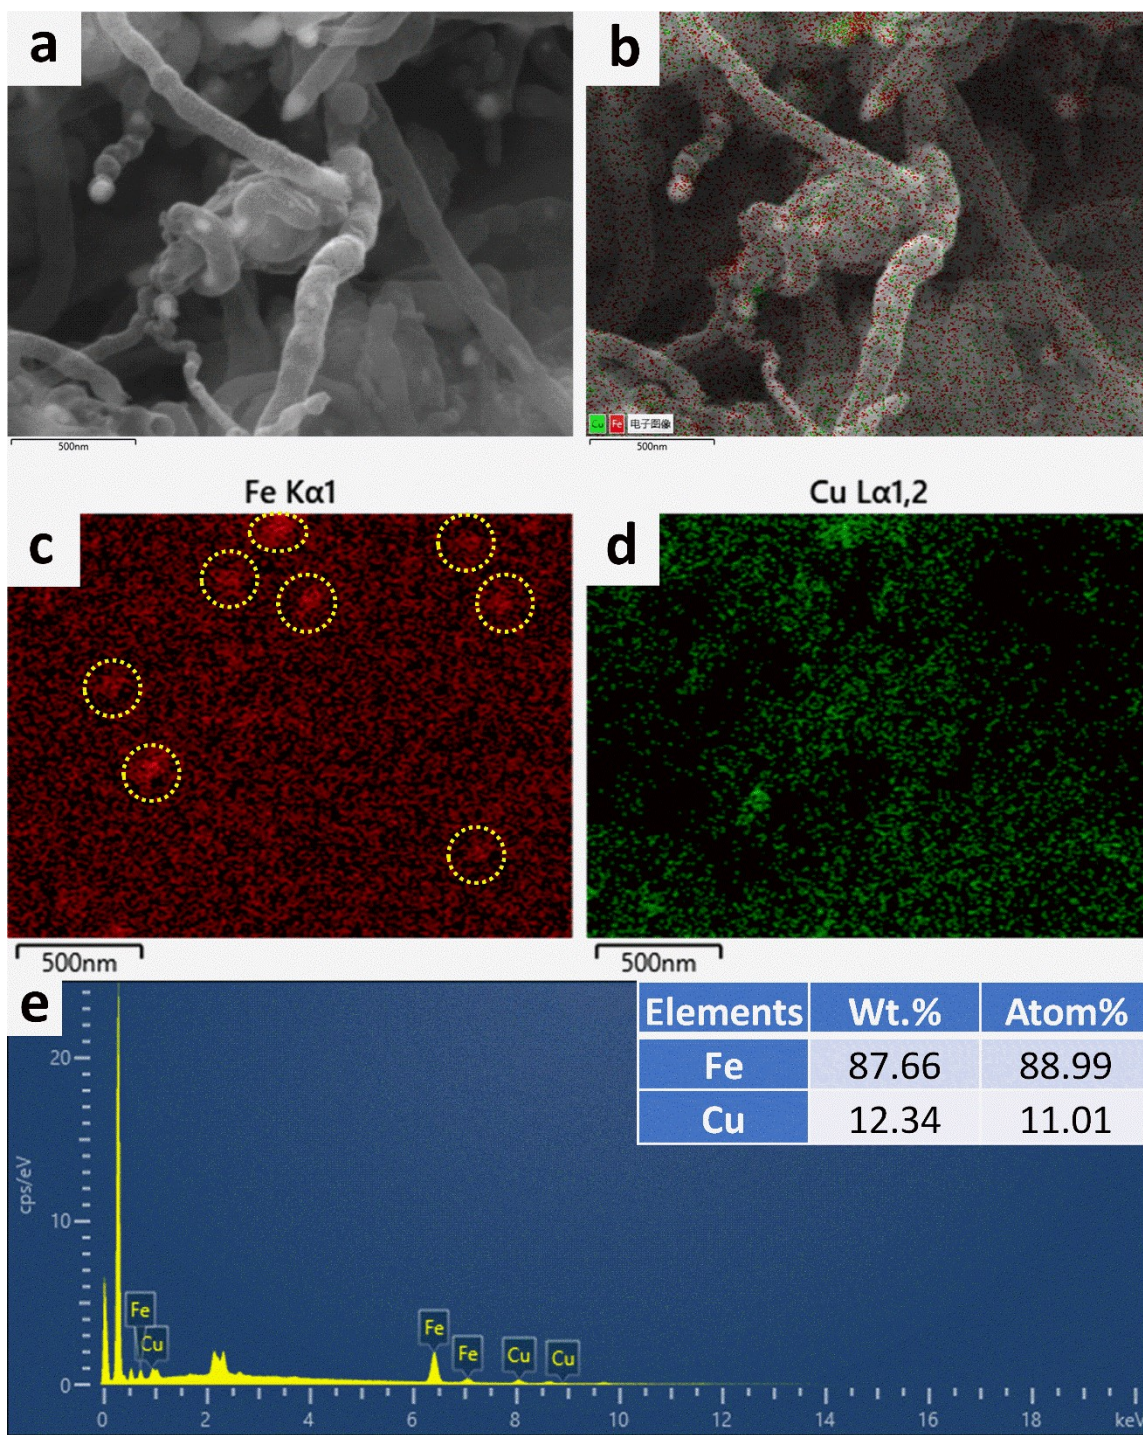

**Fig. S19** (a-e) SEM-based EDS-mapping images and the corresponding elemental content of FeCu-DSAs@CNT-AW (inset shows the average elemental content of two tests data).

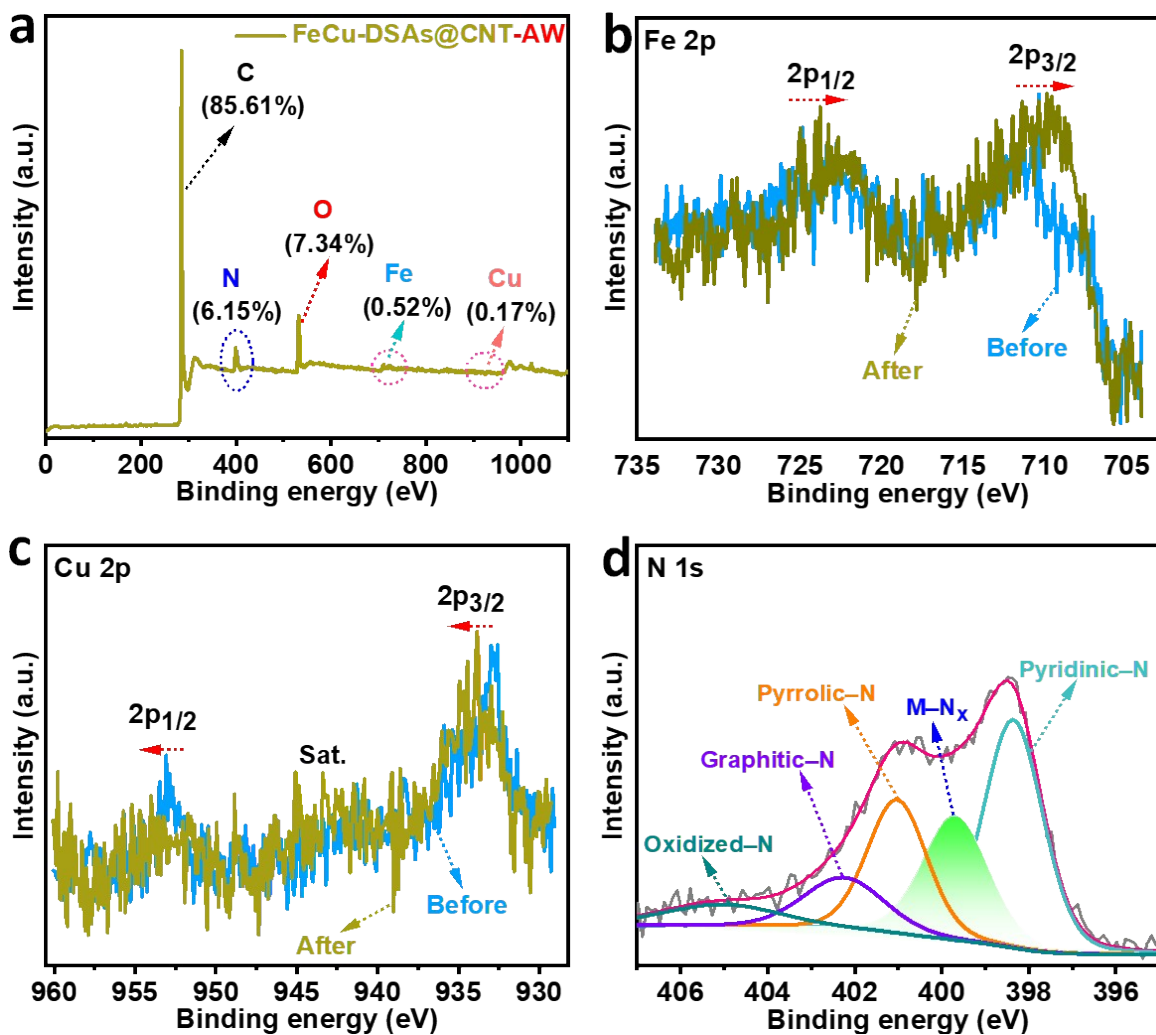

**Fig. S20** (a) XPS survey spectrum, (b) Fe 2p, (c) Cu 2p and (d) N 1s XPS spectral data of FeCu-DSAs@CNT-AW, respectively.

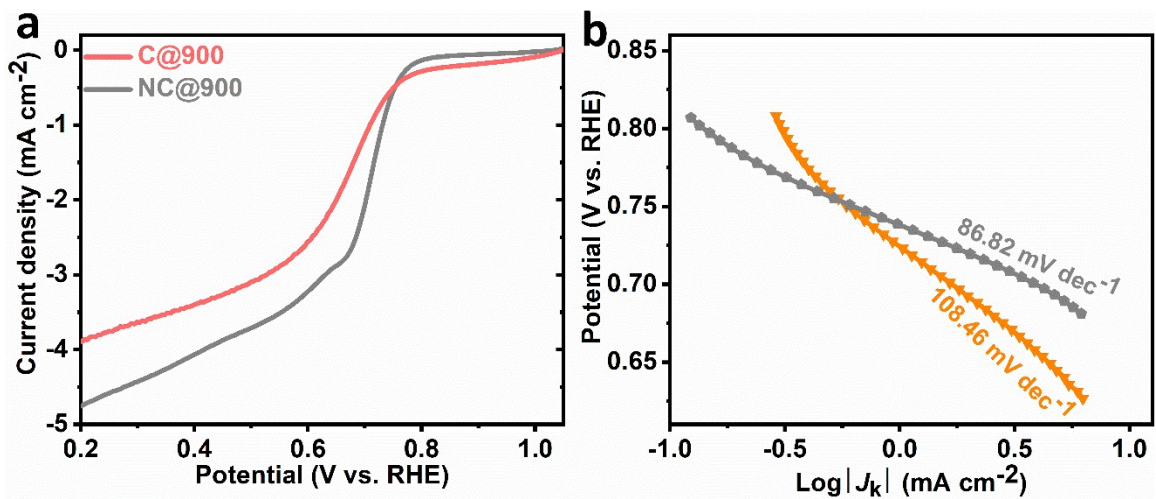

Fig. S21 (a,b) LSV curves and the corresponding Tafel slopes of C@900 and NC@900.



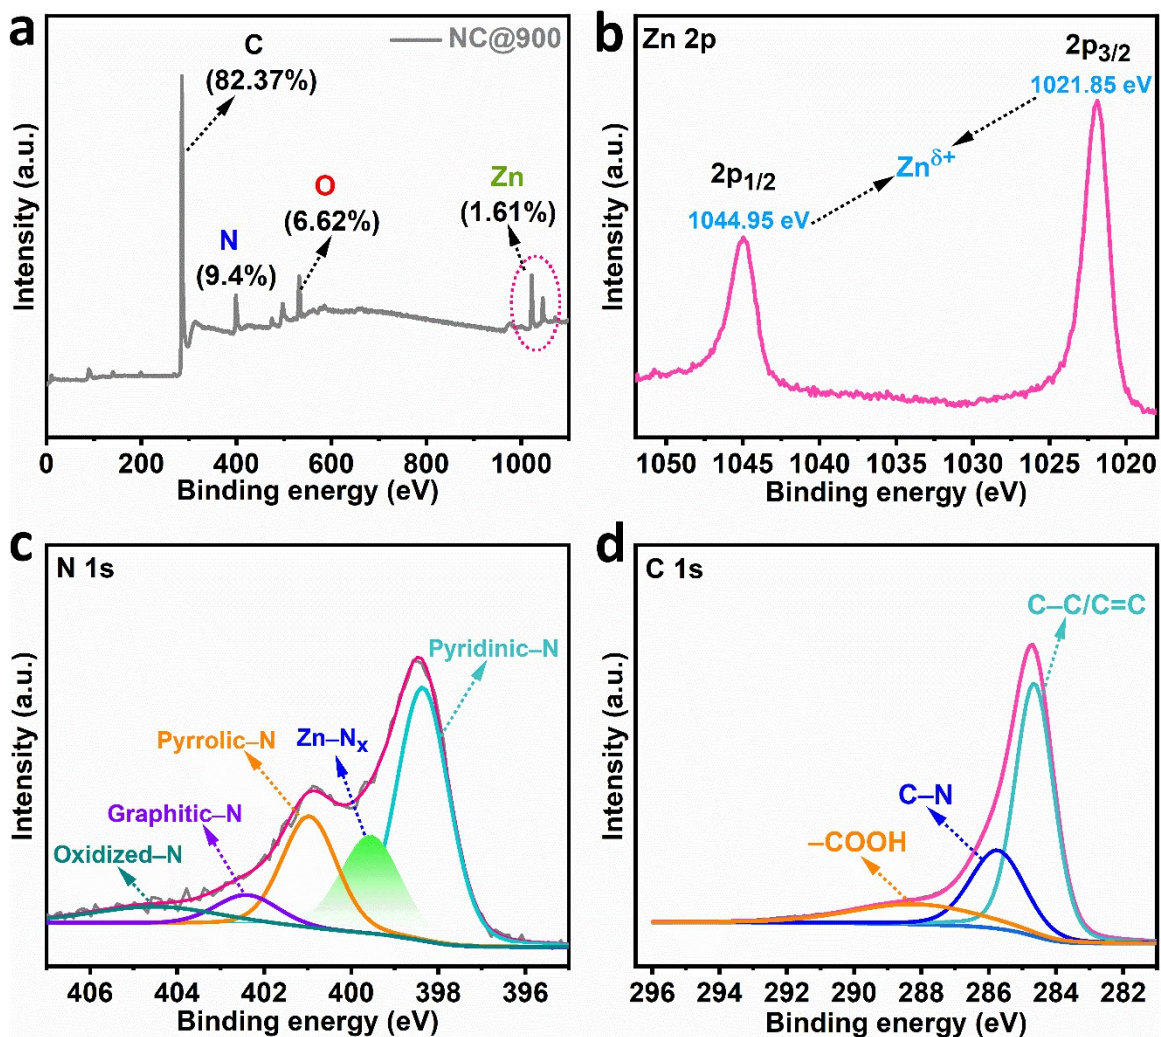

**Fig. S22** (a) XPS survey spectrum, (b) Zn 2p, (c) N 1s, and (d) C 1s XPS spectral data of NC@900.

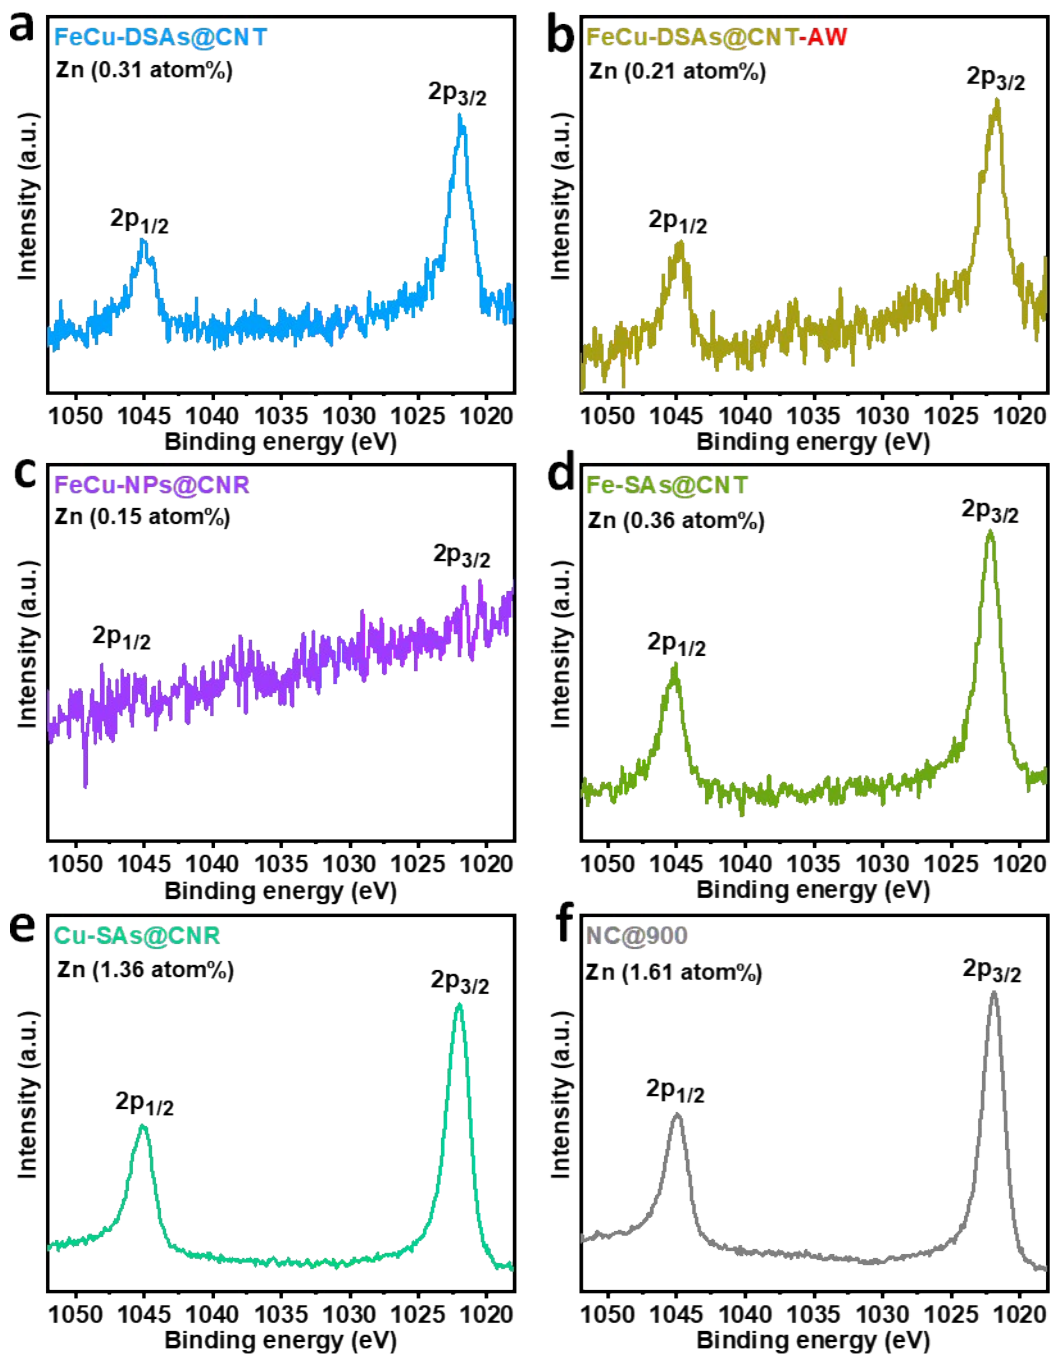

**Fig. S23** Zn 2p XPS spectral data of (a) FeCu-DSAs@CNT, (b) FeCu-DSAs@CNT-AW, (c) FeCu-NPs@CNR, (d) Fe-SAs@CNT, (e) Cu-SAs@CNR and (f) NC@900, respectively.

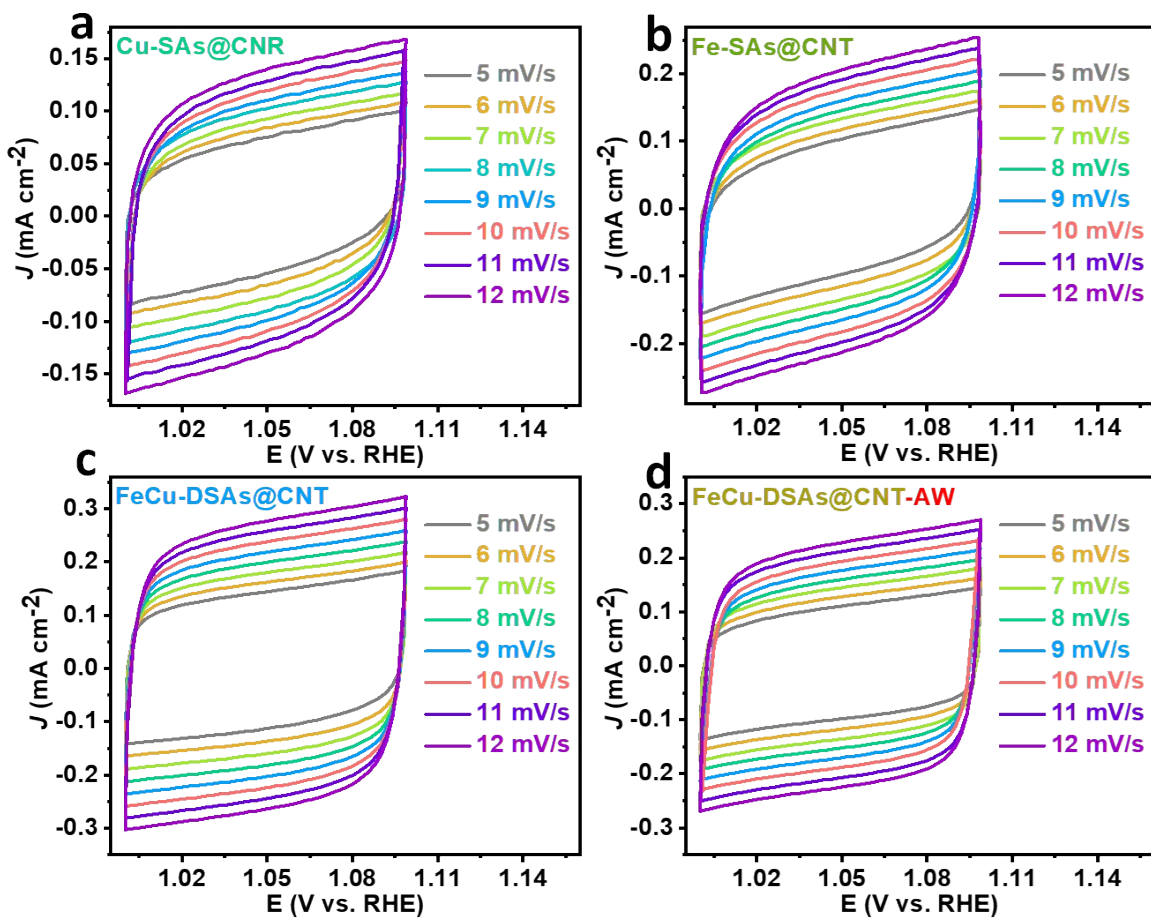

**Fig. S24** (a-d) The plots of cyclic voltammograms operated within a non-Faradaic capacitive current range to estimate the ECSA in 0.1 M KOH electrolyte.

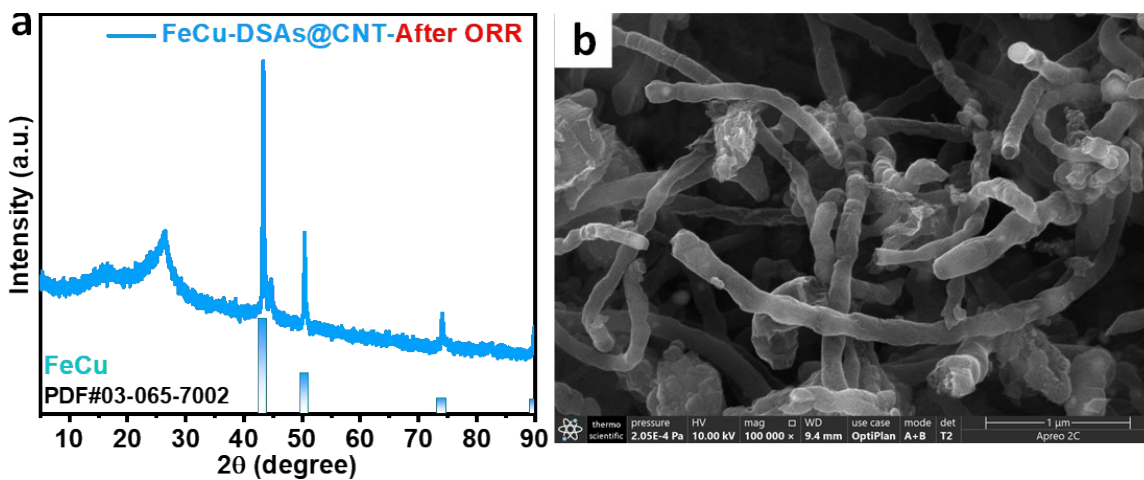

**Fig. S25** (a) Powder XRD data, and (b) the SEM image of FeCu-DSAs@CNT-after ORR.

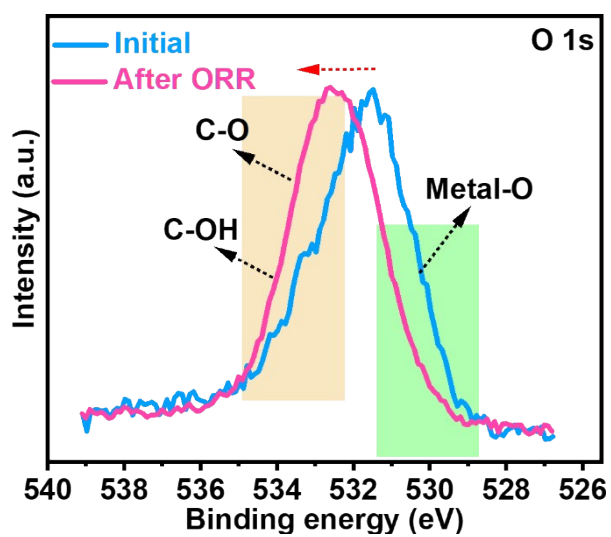

**Fig. S26** O 1s XPS spectral data of FeCu-DSAs@CNT-after ORR, in comparison to its initial data.

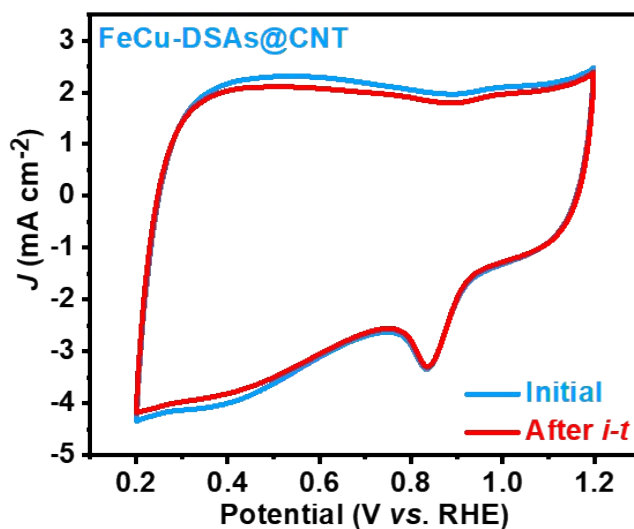

**Fig. S27** CV plots obtained before and after OER  $i-t$  for FeCu-DSAs@CNT.

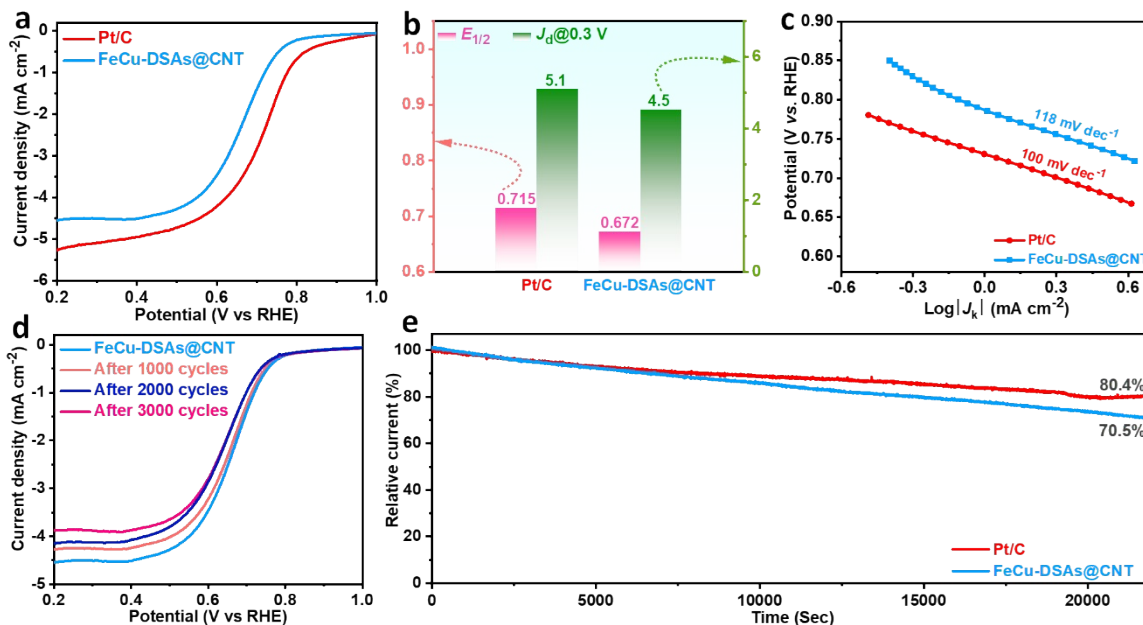

**Fig. S28** (a) LSV plots, (b) the corresponding  $E_{1/2}$  and  $J_d$  data, and (c) the Tafel slopes of Pt/C and FeCu-DSAs@CNT electrocatalysts in 0.5 M  $H_2SO_4$  electrolyte. (d) Initial LSV curve of FeCu-DSAs@CNT in association with LSV curves obtained after ORR CV cycling tests, and (e) the long-term  $i-t$  plots of both FeCu-DSAs@CNT and Pt/C in 0.5 M  $H_2SO_4$ .

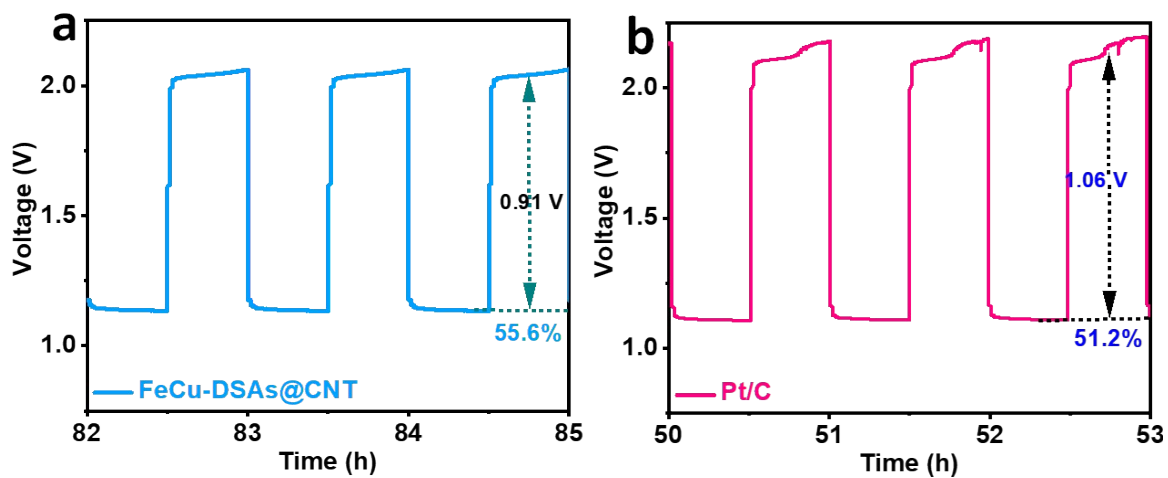

**Fig. S29** Zoomed-in views of charge/discharge plots of (a) FeCu-DSAs@CNT and (b) Pt/C-based batteries at the end of the respective experiments.

**Table S1:** ORR performance of FeCu-DSAs@CNT in comparison with the other **dual single-atom site catalysts** reported recently in 0.1 M KOH solution.

| <b>Materials</b>      | $E_{\text{onset}}$<br>(V) | $E_{1/2}$<br>(V) | $J_d$ at 0.3 V<br>(mA cm <sup>-2</sup> ) | <b>Ref.</b>      |
|-----------------------|---------------------------|------------------|------------------------------------------|------------------|
| <b>FeCu-DSAs@CNT</b>  | <b>1.06</b>               | <b>0.91</b>      | <b>6.05</b>                              | <b>This work</b> |
| <b>Fe-SAs@CNT</b>     | <b>1.0</b>                | <b>0.852</b>     | <b>4.35</b>                              |                  |
| <b>Cu-SAs@CNR</b>     | <b>0.972</b>              | <b>0.786</b>     | <b>4.16</b>                              |                  |
| <b>Pt/C (20 wt.%)</b> | <b>0.975</b>              | <b>0.847</b>     | <b>5.38</b>                              |                  |
| FeCu-NC               | 0.96                      | 0.882            | ~5.7                                     | 8                |
| Fe-NC                 | 0.93                      | 0.858            | ~5.5                                     |                  |
| Cu-NC                 | 0.89                      | 0.825            | ~5.2                                     |                  |
| Pt/C                  | 0.92                      | 0.843            | ~5.5                                     |                  |
| Fe/Cu-N-C             | 1.007                     | 0.879            | ~5.9                                     | 9                |
| Fe-N-C                | 0.968                     | 0.861            | ~5.8                                     |                  |
| Cu-N-C                | 0.905                     | 0.798            | ~5.9                                     |                  |
| Pt/C                  | 0.972                     | 0.835            | ~5.3                                     |                  |
| NCAG/Fe-Cu            | 1.07                      | 0.94             | ~5.9                                     | 10               |
| NCAG/Fe-Fe            | 1.04                      | 0.90             | ~5.8                                     |                  |
| Pt/C                  | 0.99                      | 0.86             | ~5.3                                     |                  |
| Fe,Cu DAs-NC          | 1.08                      | 0.94             | ~6.0                                     | 11               |
| Fe SA-NC              | 1.05                      | 0.92             | ~5.6                                     |                  |
| Cu SA-NC              | 1.00                      | 0.84             | ~5.0                                     |                  |

|            |      |       |      |    |
|------------|------|-------|------|----|
| Pt/C       | 1.04 | 0.87  | ~5.5 |    |
| FeCo-N-HCN | 0.98 | 0.86  | ~5.6 | 12 |
| Fe-N-HCN   | 0.96 | 0.76  | ~5.3 |    |
| Pt/C       | 1.03 | 0.85  | ~5.8 |    |
| FeCu-NC    | 0.98 | 0.87  | ~5.9 | 13 |
| FeCu-SAC   | NA   | 0.926 | ~5.8 | 14 |
| Fe-SAC     | NA   | 0.899 | ~5.6 |    |
| Cu-SAC     | NA   | 0.810 | ~4.6 |    |
| Pt/C       | NA   | 0.884 | ~5.8 |    |
| Fe-Cu-N/C  | NA   | 0.89  | ~5.8 | 15 |
| Pt/C       | NA   | 0.84  | ~5.4 |    |
| FeCu-DA/NC | 0.96 | 0.86  | ~6.0 | 16 |
| Fe-DA/NC   | 0.91 | 0.8   | ~6.0 |    |
| Cu-DA/NC   | 0.87 | 0.78  | ~5.0 |    |
| Pt/C       | 0.94 | 0.83  | ~5.5 |    |

**Abbreviations:** NA = not available; NCAG = nitrogen-doped carbon aerogel; N-HCN = N-doped hollow carbon nanocages; SA = Single-atom; DA = Dual-atom, and NC = N-doped carbon.



**Table S2:** ORR performance of FeCu-DSAs@CNT in comparison with **other nanoparticles coupled SACs or DSACs** reported recently.

| Materials                | Atomic sites                          | Associated particle  | $E_{1/2}$ (V) | Tafel slope (mV dec <sup>-1</sup> ) | Ref.      |
|--------------------------|---------------------------------------|----------------------|---------------|-------------------------------------|-----------|
| FeCu-DSAs@CNT            | Fe-N <sub>x</sub> & Cu-N <sub>x</sub> | FeCu                 | 0.91          | 48.15                               | This work |
| Cu@Fe-N-C                | Fe-N <sub>x</sub> & Cu-N <sub>x</sub> | Cu                   | 0.892         | 65                                  | 17        |
| Cu/Fe-NG                 | Fe-N <sub>x</sub> & Cu-N <sub>x</sub> | Cu                   | 0.88          | 74                                  | 18        |
| Fe-Ni ANC@NSCA           | Fe-N <sub>4</sub> & Ni-N <sub>4</sub> | Fe-Ni                | 0.891         | 63                                  | 19        |
| FePc  CNTs  NiCo/CP      | Fe-N <sub>4</sub>                     | NiCo                 | 0.902         | 50                                  | 20        |
| Fe <sub>x</sub> /Cu-N@CF | Cu-N <sub>4</sub>                     | Fe <sub>x</sub>      | 0.944         | 52.61                               | 21        |
| Fe-N-HMCTs               | Fe-N <sub>x</sub>                     | Fe <sub>3</sub> C    | 0.872         | 89                                  | 22        |
| 1MIL/40ZIF-1000          | Fe-N <sub>x</sub>                     | Fe-Fe <sub>3</sub> C | 0.88          | 50                                  | 23        |
| Fe <sub>3</sub> C@NCNTs  | Fe-N <sub>x</sub>                     | Fe <sub>3</sub> C    | 0.84          | 77                                  | 24        |
| NP-Fe-NHPC               | Fe-N <sub>x</sub>                     | Fe <sub>3</sub> C    | 0.88          | NA                                  | 25        |

**Abbreviations:** NG = N-doped graphene; ANC@NSCA = alloy nanoclusters (Fe-Ni ANCs) anchored on N, S co-doped carbon aerogel; CF = carbon nanofiber; N-HMCTs = N-doped hollow mesoporous carbon tubes; NCNTs = N-doped carbon nanotubes; NHPC = hierarchically porous carbon.

## References:

- 1 G. Kresse and J. Hafner, *Phys. Rev. B*, 1994, **49**, 14251–14269.
- 2 L. Yu, X. Pan, X. Cao, P. Hu and X. Bao, *J. Catal.*, 2011, **282**, 183–190.
- 3 S. Zuluaga and S. Stolbov, *J. Chem. Phys.*, 2011, **135**, 134702.
- 4 C. Brea and G. Hu, *ACS Catal.*, 2023, **13**, 4992–4999.
- 5 P. Li, F. Qiang, X. Tan, Z. Li, J. Shi, S. Liu, M. Huang, J. Chen, W. Tian, J. Wu, W. Hu and H. Wang, *Appl. Catal. B Environ.*, 2024, **340**, 123231.
- 6 H. Liu, L. Jiang, Y. Wang, X. Wang, J. Khan, Y. Zhu, J. Xiao, L. Li and L. Han, *Chem. Eng. J.*, 2023, **452**, 138938.
- 7 Y. Liu, J. Ma, S. Huang, S. Niu and S. Gao, *Nano Energy*, 2023, **117**, 108840.
- 8 Z. Xiao, P. Sun, Z. Qiao, K. Qiao, H. Xu, S. Wang and D. Cao, *Chem. Eng. J.*, 2022, **446**, 137112.
- 9 M. Bu, Y. Liu, S. Liao, W. Liu, Z. Yang, J. Jiang, X. Gao, Y. Yang and H. Liu, *Carbon N. Y.*, 2023, **214**, 118365.
- 10 T. He, Y. Chen, Q. Liu, B. Lu, X. Song, H. Liu, M. Liu, Y. Liu, Y. Zhang, X. Ouyang and S. Chen, *Angew. Chemie Int. Ed.*, 2022, **61**, e202201007.
- 11 F. Kong, M. Wang, Y. Huang, G. Meng, M. Chen, H. Tian, Y. Chen, C. Chen, Z. Chang, X. Cui and J. Shi, *Energy Storage Mater.*, 2023, **54**, 533–542.
- 12 H. Li, Y. Wen, M. Jiang, Y. Yao, H. Zhou, Z. Huang, J. Li, S. Jiao, Y. Kuang and S. Luo, *Adv. Funct. Mater.*, 2021, **31**, 2011289.
- 13 X. Zhou, K. Song, Y. Feng, C. Jiang, Z. Chen, Z. Wang, N. Yue, X. Ge, W. Zhang and W. Zheng, *Nano Res.*, 2023, **16**, 4634–4642.
- 14 H. Yang, H. Huang, Q. Wang, L. Shang, T. Zhang and S. Wang, *J. Mater. Chem. A*, 2023, **11**, 6191–6197.
- 15 W. Fan, Z. Li, C. You, X. Zong, X. Tian, S. Miao, T. Shu, C. Li and S. Liao, *Nano Energy*, 2017, **37**, 187–194.

- 16 C. Du, Y. Gao, H. Chen, P. Li, S. Zhu, J. Wang, Q. He and W. Chen, *J. Mater. Chem. A*, 2020, **8**, 16994–17001.
- 17 Z. Wang, H. Jin, T. Meng, K. Liao, W. Meng, J. Yang, D. He, Y. Xiong and S. Mu, *Adv. Funct. Mater.*, 2018, **28**, 1802596.
- 18 L. Xu, Y. Tian, D. Deng, H. Li, D. Zhang, J. Qian, S. Wang, J. Zhang, H. Li and S. Sun, *ACS Appl. Mater. Interfaces*, 2020, **12**, 31340–31350.
- 19 H. Li, X. Shu, P. Tong, J. Zhang, P. An, Z. Lv, H. Tian, J. Zhang and H. Xia, *Small*, 2021, **17**, 2102002.
- 20 S. Ding, L. He, L. Fang, Y. Zhu, T. Li, Z. Lyu, D. Du, Y. Lin and J. Li, *Adv. Energy Mater.*, 2022, **12**, 2202984.
- 21 S. Wu, S. Jiang, S.-Q. Liu, X. Tan, N. Chen, J.-L. Luo, S. H. Mushrif, K. Cadien and Z. Li, *Energy Environ. Sci.*, 2023, **16**, 3576–3586.
- 22 X. Cui, L. Gao, S. Lei, S. Liang, J. Zhang, C. D. Sewell, W. Xue, Q. Liu, Z. Lin and Y. Yang, *Adv. Funct. Mater.*, 2021, **31**, 2009197.
- 23 H. Wang, F. Yin, N. Liu, R. Kou, X. He, C. Sun, B. Chen, D. Liu and H. Yin, *Adv. Funct. Mater.*, 2019, **29**, 1901531.
- 24 C. Xu, C. Guo, J. Liu, B. Hu, J. Dai, M. Wang, R. Jin, Z. Luo, H. Li and C. Chen, *Energy Storage Mater.*, 2022, **51**, 149–158.
- 25 G. Chen, P. Liu, Z. Liao, F. Sun, Y. He, H. Zhong, T. Zhang, E. Zschech, M. Chen, G. Wu, J. Zhang and X. Feng, *Adv. Mater.*, 2020, **32**, 1907399.
